# Supplementary material
Source: MDPI journal article supplement (https://www.mdpi.com/2410-3888/8/12/599)
Supplement: s1 [file s1]

# **Electronic Supplementary Material**

## **Spatial density, biomass, and composition of crustacean zooplankton on Lake Michigan beaches**

Samuel J. Johnston<sup>a,b,†,\*</sup>, Jason B. Smith<sup>c</sup>, Brady D. Slater<sup>a,b</sup>, and Jonathan P. Dousek<sup>a,b</sup>

<sup>a</sup>School of Natural Resources, Lake Superior State University, Sault Sainte Marie, MI, USA

<sup>b</sup>Center for Freshwater Research and Education, Lake Superior State University, Sault Sainte Marie, MI, USA

<sup>c</sup>Sault Ste. Marie Tribe of Chippewa Indians, Sault Ste. Marie, MI, USA

<sup>†</sup>Present address: Oklahoma Department of Wildlife Conservation, Porter OK, USA

\*Corresponding author: email:Samuel.Johnston@ODWC.OK.Gov, phone: +1 (918) 348 0578

## **Electronic Supplementary Material**

Figures S1-S2 pages 2-3

Tables S1-S4 pages 4-7

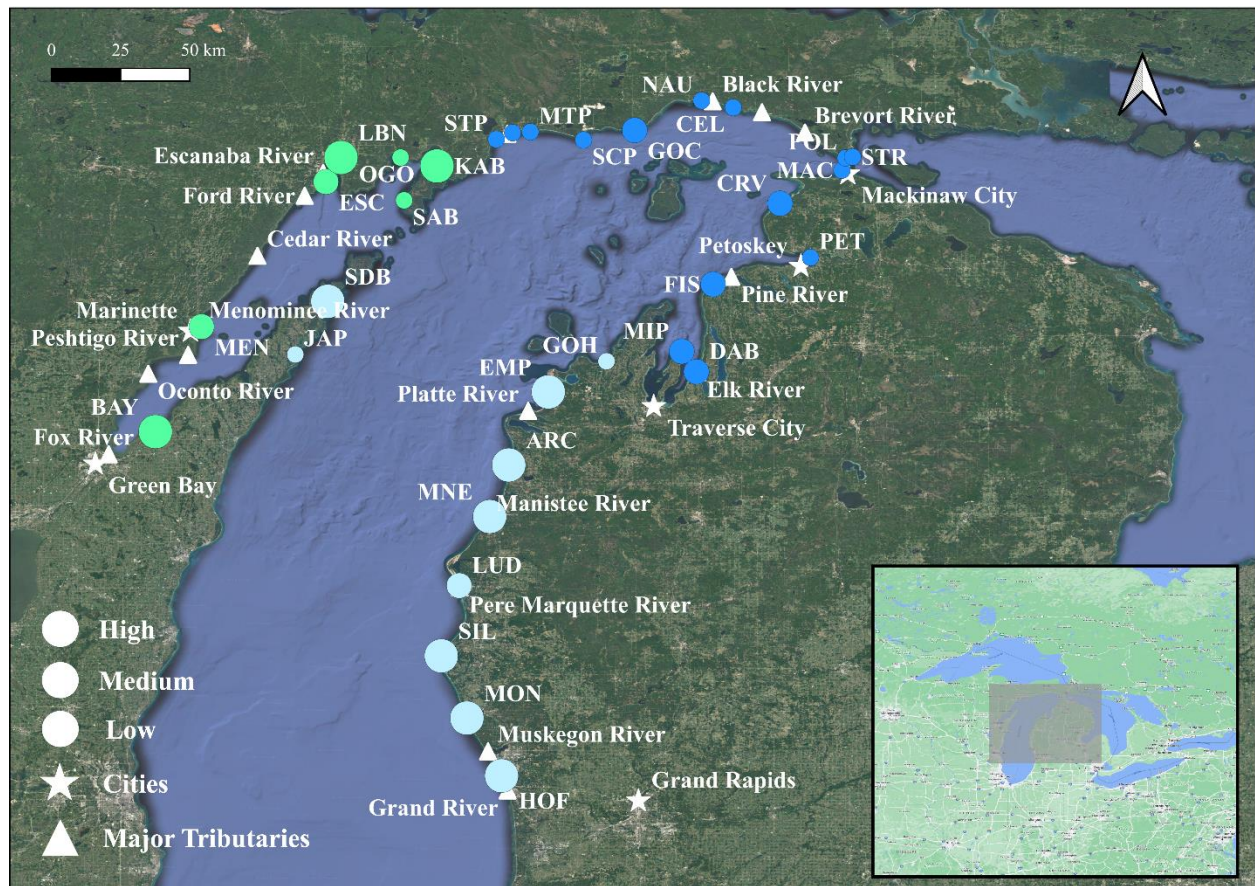

Figure S1. Mean crustacean zooplankton biomass on 32 beach sites sampled in Lake Michigan from June 26-29, 2020. ARC = Arcadia, BAY = Bayshore, CEL = Cedar Loft, CRV = Cross Village, DAB = Dam Beach, EMP = Empire, ESC = Escanaba, FIS = Fisherman's Island State Park, GOH = Good Harbor, GOC = Gould City, HOF = Hoffmaster State Park, JAP = Jackson Port, KAB = Kates Bay, LBN = Little Bay de Noc, LUD = Ludington, MAC = Mackinaw City, MNE = Manistee, MAN = Manistique, MTP = Manistique Township Park, MEN = Menominee, MIP = Mission Point, MON = Montague, NAU = Naubinway, OGO = Ogontz, PET = Petoskey, POL = Point La barbe, SAB = Sac Bay, SDB = Sand Bay, SCP = Seul Choix Point, SIL = Silver Lake, STP = Stony Point, STR = Straits.

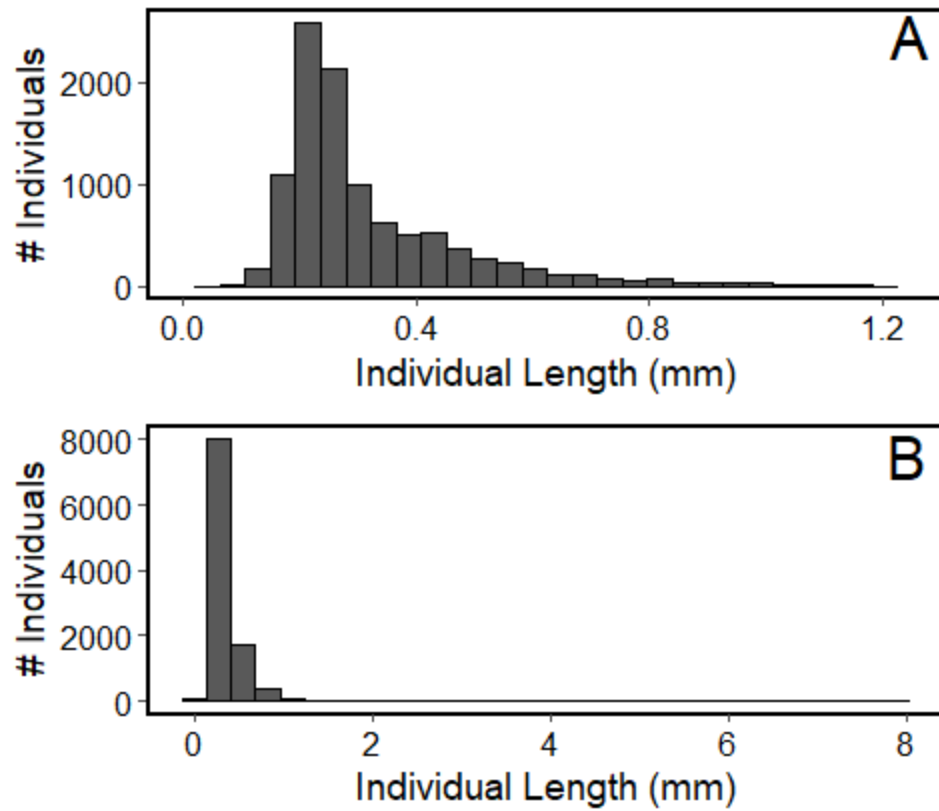

Figure S2. Lengths of individual crustacean zooplankton A) excluding *Leptodora* (which is a larger-bodied zooplankton) and B) including *Leptodora*. Notice the change in bin ranges with the addition of *Leptodora*.

Table S1. Environmental and total crustacean zooplankton data collected for each individual site. Cond is specific conductivity ( $\mu\text{S cm}^{-1}$ ), Temp is subsurface water temperature ( $^{\circ}\text{C}$ ), and DO is dissolved oxygen concentration ( $\text{mg L}^{-1}$ ). Mean total crustacean zooplankton density (Density: individuals  $\text{m}^{-3}$ ) and biomass (Biomass:  $\text{mg DW m}^{-3}$ ) and the  $\pm 1$  S.E. across the replicates for each site are provided. Menominee was the only site with two versus three replicates collected for zooplankton.

| Bay                      | Code | Lat      | Long     | Cond | pH   | Temp  | DO    | Density | Density<br>$\pm 1$ S.E. | Biomass | Biomass<br>$\pm 1$ S.E. |
|--------------------------|------|----------|----------|------|------|-------|-------|---------|-------------------------|---------|-------------------------|
| Bayshore                 | BAY  | 44.63798 | -87.7999 | 306  | 7.75 | 23.08 | 6.03  | 58908   | 20750                   | 24.7    | 8.1                     |
| Menominee                | MEN  | 45.10026 | -87.5969 | 275  | 7.68 | 18.17 | 7.68  | 3380    | 393                     | 7.2     | 4.1                     |
| Escanaba                 | ESC  | 45.73806 | -87.0481 | 266  | 8.53 | 19.41 | 9.08  | 14737   | 3310                    | 9.1     | 1.5                     |
| Little Bay De Noc        | LBN  | 45.845   | -86.9819 | 254  | 8.04 | 20.35 | 8.22  | 40781   | 11232                   | 16.1    | 5.5                     |
| Ogontz                   | OGO  | 45.84473 | -86.7194 | 267  | 8.26 | 23.36 | 8.89  | 6340    | 2589                    | 1.7     | 0.7                     |
| Kates Bay                | KAB  | 45.80755 | -86.5587 | 260  | 8.21 | 22.24 | 8.35  | 24679   | 8697                    | 26.7    | 16.1                    |
| Sac Bay                  | SAB  | 45.65641 | -86.7038 | 279  | 8.26 | 21.71 | 10.18 | 6995    | 2716                    | 1.9     | 0.7                     |
| Manistique               | MAN  | 45.95404 | -86.2254 | 258  | 8.32 | 16.24 | 9.93  | 419     | 302                     | 0.5     | 0.3                     |
| Stony Point              | STP  | 45.92523 | -86.2972 | 274  | 8.32 | 15.48 | 9.72  | 2987    | 826                     | 2.2     | 0.5                     |
| Manistique Township Park | MTP  | 45.9577  | -86.1473 | 272  | 8.33 | 14.12 | 9.93  | 472     | 78.6                    | 0.7     | 0.1                     |
| Seul Choix Point         | SCP  | 45.92199 | -85.9126 | 279  | 8.33 | 13.39 | 10.58 | 655     | 139                     | 1.8     | 0.3                     |
| Gould City               | GOC  | 45.96493 | -85.6877 | 278  | 8.45 | 11.86 | 11.64 | 4454    | 1051                    | 7.1     | 1.7                     |
| Naubinway                | NAU  | 46.09534 | -85.3924 | 268  | 8.34 | 15.24 | 9.42  | 550     | 136                     | 0.6     | 0.2                     |
| Cedar Loft               | CEL  | 46.065   | -85.253  | 253  | 8.34 | 16.01 | 8.91  | 4768    | 1981                    | 4.4     | 1.5                     |
| Point La barbe           | POL  | 45.84289 | -84.7577 | 262  | 8.51 | 17.12 | 9.24  | 865     | 354                     | 1.2     | 0.9                     |
| Straits                  | STR  | 45.84722 | -84.7266 | 249  | 8.48 | 18.75 | 9.04  | 1533    | 357                     | 3.7     | 0.9                     |
| Cross Village            | CRV  | 45.6426  | -85.0465 | 306  | 8.88 | 17.45 | 9.26  | 5135    | 661                     | 8.6     | 1.5                     |
| Mackinaw                 | MAC  | 45.78899 | -84.774  | 295  | 8.89 | 16.17 | 9.43  | 341     | 146                     | 0.2     | 0.2                     |
| Petoskey                 | PET  | 45.40449 | -84.9123 | 202  | 8.88 | 19.83 | 9.17  | 1781    | 347                     | 1.2     | 0.2                     |
| Fisherman's              | FIS  | 45.28713 | -85.3417 | 311  | 8.94 | 19.13 | 10.87 | 7126    | 2184                    | 7.7     | 2.4                     |
| Dam Beach                | DAB  | 44.90215 | -85.4154 | 307  | 8.88 | 21.05 | 10    | 7912    | 578                     | 9.4     | 1.2                     |
| Mission Point            | MIP  | 44.99159 | -85.4798 | 299  | 8.91 | 18.37 | 9.97  | 6419    | 526                     | 6.3     | 0.2                     |
| Good Harbor              | GOH  | 44.9479  | -85.8117 | 315  | 8.77 | 18.91 | 9.44  | 8331    | 1500                    | 4.2     | 0.3                     |
| Empire                   | EMP  | 44.81294 | -86.068  | 316  | 8.8  | 20.34 | 9.12  | 54781   | 15114                   | 26.9    | 7.3                     |
| Arcadia                  | ARC  | 44.49132 | -86.2424 | 313  | 8.84 | 22.15 | 9.06  | 25478   | 9764                    | 23.9    | 11.7                    |
| Manistee                 | MNE  | 44.26431 | -86.3264 | 302  | 8.96 | 21.38 | 10.13 | 44799   | 20366                   | 22.3    | 10.5                    |
| Ludington                | LUD  | 43.96046 | -86.4611 | 313  | 8.95 | 18.12 | 10.43 | 23146   | 3131                    | 8.7     | 2.1                     |
| Silver Lake              | SIL  | 43.65097 | -86.5398 | 311  | 9.03 | 19.05 | 10.09 | 74010   | 14045                   | 30.6    | 7.3                     |
| Montague                 | MON  | 43.37731 | -86.4268 | 321  | 9.01 | 20.1  | 10.78 | 21456   | 461                     | 15.8    | 2.7                     |
| Hoffmaster               | HOF  | 43.12318 | -86.2742 | 338  | 9.13 | 22.98 | 10.4  | 49672   | 6853                    | 27.2    | 4.7                     |
| Jackson Port             | JAP  | 44.97788 | -87.1832 | 285  | 8.33 | 21.23 | 9.92  | 2070    | 114                     | 1.8     | 0.2                     |
| Sand Bay                 | SDB  | 45.21191 | -87.0403 | 288  | 8.46 | 23.08 | 9.36  | 14226   | 5734                    | 17.5    | 8.4                     |

Table S2. Density (individuals m<sup>-3</sup>) and the  $\pm 1$  S.E. across the replicates of each broader zooplankton group by site. NA signifies individuals of that group only being found in a single replicate from the site, or not found at all, and so a S.E. was not calculated.

| Bay                      | Nauplii | Nauplii<br>$\pm 1$ S.E. | Calanoid | Calanoid<br>$\pm 1$ S.E. | Cyclopoid | Cyclopoid<br>$\pm 1$ S.E. | Cladoceran | Cladoceran<br>$\pm 1$ S.E. |
|--------------------------|---------|-------------------------|----------|--------------------------|-----------|---------------------------|------------|----------------------------|
| Bayshore                 | 3301    | 1656                    | 0        | NA                       | 6170      | 2382                      | 49437      | 20034                      |
| Menominee                | 550     | 314                     | 825      | 589                      | 825       | 275                       | 1179       | 157                        |
| Escanaba                 | 327     | 47.2                    | 249      | 85.9                     | 655       | 228                       | 13505      | 3334                       |
| Little Bay De Noc        | 3694    | 795                     | 0        | NA                       | 1493      | 393                       | 35594      | 10318                      |
| Ogontz                   | 314     | 78.6                    | 0        | NA                       | 550       | 120                       | 5580       | 2588                       |
| Kates Bay                | 0       | NA                      | 0        | NA                       | 812       | 148                       | 23867      | 8580                       |
| Sac Bay                  | 118     | 39.3                    | 0        | NA                       | 118       | 39.3                      | 6838       | 2716                       |
| Manistique               | 0       | NA                      | 314      | NA                       | 157       | 78.6                      | 236        | 157                        |
| Stony Point              | 131     | 26.2                    | 236      | 78.6                     | 681       | 146                       | 1939       | 825                        |
| Manistique Township Park | 157     | 78.6                    | 78.6     | 0                        | 131       | 26.2                      | 183        | 104.8                      |
| Seul Choix Point         | 157     | NA                      | 288      | 52.4                     | 262       | 105                       | 157        | NA                         |
| Gould City               | 681     | 114                     | 2332     | 988                      | 812       | 159                       | 943        | 628.8                      |
| Naubinway                | 131     | 26.2                    | 118      | 39.3                     | 131       | 26.2                      | 210        | 94.5                       |
| Cedar Loft               | 393     | NA                      | 393      | 136                      | 865       | 208                       | 3380       | 1668                       |
| Point La barbe           | 262     | 26.2                    | 131      | 52.4                     | 367       | 210                       | 314        | NA                         |
| Straits                  | 147     | 88.4                    | 334      | 265                      | 255       | 92.9                      | 845        | 403                        |
| Cross Village            | 1520    | 114                     | 3118     | 502                      | 367       | 94.5                      | 131        | 52                         |
| Mackinaw                 | 118     | 39.3                    | 78.6     | 0                        | 78.6      | NA                        | 275        | 196                        |
| Petoskey                 | 760     | 139                     | 655      | 114                      | 341       | 69.3                      | 78.6       | NA                         |
| Fisherman's              | 1965    | 798                     | 3799     | 1432                     | 1258      | 90.8                      | 157        | 78.8                       |
| Dam Beach                | 2017    | 26.2                    | 3799     | 498                      | 1231      | 138.6                     | 865        | 45.4                       |
| Mission Point            | 2829    | 643                     | 2436     | 371                      | 681       | 171.8                     | 472        | 90.8                       |
| Good Harbor              | 2829    | 396                     | 1912     | 749                      | 288       | 69.3                      | 1991       | 522                        |
| Empire                   | 943     | 236                     | 2908     | 1158                     | 4480      | 1930                      | 46450      | 12971                      |
| Arcadia                  | 1389    | 644                     | 5973     | 2217                     | 2332      | 644                       | 15785      | 6895                       |
| Manistee                 | 1572    | 78.6                    | 1886     | 836                      | 4401      | 1468                      | 36940      | 18073                      |
| Ludington                | 3026    | 682                     | 413      | 177                      | 1533      | 379                       | 18313      | 2155                       |
| Silver Lake              | 7205    | 2800                    | 236      | NA                       | 5292      | 1347                      | 61435      | 12477                      |
| Montague                 | 2646    | 664                     | 1441     | 695                      | 6104      | 869                       | 11134      | 1052                       |
| Hoffmaster               | 1572    | 283                     | 786      | 283                      | 4716      | 1361                      | 42599      | 5248                       |
| Jackson Port             | 78.6    | 0                       | 118      | 39.3                     | 734       | 114                       | 1205       | 172                        |
| Sand Bay                 | 629     | 157                     | 413      | 295                      | 1899      | 1481                      | 11632      | 4380                       |

Table S3. Biomass (mg DW m<sup>-3</sup>) and the  $\pm 1$  S.E. across the replicates of each broader zooplankton group by site. NA signifies individuals of that group only being found in a single replicate from the site, or not found at all, and so a S.E. was not calculated.

| Bay                         | Nauplii | Nauplii<br>$\pm 1$ S.E. | Calanoid | Calanoid<br>$\pm 1$ S.E. | Cyclopoid | Cyclopoid<br>$\pm 1$ S.E. | Cladoceran | Cladoceran<br>$\pm 1$ S.E. |
|-----------------------------|---------|-------------------------|----------|--------------------------|-----------|---------------------------|------------|----------------------------|
| Bayshore                    | 0.5     | 0.3                     | 0        | NA                       | 8.0       | 2.7                       | 16.2       | 5.7                        |
| Menominee                   | 0.1     | 0.1                     | 4.5      | 3.2                      | 1.6       | 1.1                       | 0.9        | 0.2                        |
| Escanaba                    | 0.08    | 0.01                    | 1.3      | 0.5                      | 1.5       | 0.9                       | 6.3        | 1.2                        |
| Little Bay De<br>Noc        | 0.7     | 0.2                     | 0        | NA                       | 1.4       | 0.5                       | 14.1       | 5.2                        |
| Ogontz                      | 0.03    | 0.01                    | 0        | NA                       | 0.6       | 0.2                       | 1.1        | 0.6                        |
| Kates Bay                   | 0       | NA                      | 0        | NA                       | 0.5       | 0.1                       | 26.2       | 16.1                       |
| Sac Bay                     | 0.01    | 0.01                    | 0        | NA                       | 0.2       | 0.1                       | 1.8        | 0.8                        |
| Manistique                  | 0       | NA                      | 0.7      | NA                       | 0.2       | 0.1                       | 0.1        | 0.03                       |
| Stony Point                 | 0.03    | 0.01                    | 0.4      | 0.2                      | 1.0       | 0.3                       | 0.7        | 0.3                        |
| Manistique<br>Township Park | 0.03    | 0.02                    | 0.2      | 0.1                      | 0.4       | 0.2                       | 0.2        | 0.1                        |
| Seul Choix<br>Point         | 0.07    | NA                      | 1.2      | 0.1                      | 0.6       | 0.4                       | 0.1        | NA                         |
| Gould City                  | 0.2     | 0.1                     | 4.4      | 1.6                      | 1.1       | 0.3                       | 2.3        | 1.1                        |
| Naubinway                   | 0.03    | 0.01                    | 0.4      | 0.04                     | 0.2       | 0.1                       | 0.1        | 0.1                        |
| Cedar Loft                  | 0.1     | 0                       | 1.0      | 0.4                      | 1.6       | 0.6                       | 1.7        | 0.7                        |
| Point La barbe              | 0.04    | 0.01                    | 0.3      | 0.2                      | 0.5       | 0.3                       | 1.2        | NA                         |
| Straits                     | 0.03    | 0.01                    | 1.0      | 0.9                      | 0.4       | 0.2                       | 2.2        | 1.4                        |
| Cross Village               | 0.3     | 0.03                    | 7.6      | 1.4                      | 0.4       | 0.1                       | 0.3        | 0.1                        |
| Mackinaw                    | 0.01    | 0                       | 0.2      | 0.1                      | 0.1       | NA                        | 0.1        | 0.1                        |
| Petoskey                    | 0.2     | 0.04                    | 0.8      | 0.2                      | 0.2       | 0.03                      | 0.1        | NA                         |
| Fisherman's                 | 0.4     | 0.1                     | 6.3      | 2.4                      | 1.0       | 0.1                       | 0.1        | 0.03                       |
| Dam Beach                   | 0.4     | 0.04                    | 6.5      | 1.0                      | 1.5       | 0.3                       | 1.0        | 0.5                        |
| Mission Point               | 0.6     | 0.1                     | 3.4      | 0.2                      | 0.6       | 0.2                       | 1.7        | 0.3                        |
| Good Harbor                 | 0.8     | 0.2                     | 2.4      | 0.1                      | 0.3       | 0.1                       | 0.7        | 0.2                        |
| Empire                      | 0.2     | 0.1                     | 6.3      | 2.2                      | 6.5       | 2.1                       | 13.9       | 3.7                        |
| Arcadia                     | 0.3     | 0.2                     | 15.7     | 8.4                      | 3.5       | 1.7                       | 4.5        | 1.9                        |
| Manistee                    | 0.3     | 0.1                     | 5.7      | 2.8                      | 6.7       | 2.8                       | 9.6        | 5.0                        |
| Ludington                   | 0.5     | 0.2                     | 0.9      | 0.3                      | 2.4       | 0.5                       | 5.2        | 1.2                        |
| Silver Lake                 | 1.0     | 0.4                     | 0.4      | NA                       | 9.2       | 5.0                       | 20.3       | 3.4                        |
| Montague                    | 0.5     | 0.1                     | 5.4      | 1.8                      | 6.5       | 1.2                       | 3.6        | 0.5                        |
| Hoffmaster                  | 0.4     | 0.1                     | 3.6      | 1.8                      | 6.8       | 1.5                       | 16.5       | 1.6                        |
| Jackson Port                | 0.01    | 0.01                    | 0.3      | 0.1                      | 1.1       | 0.1                       | 0.4        | 0.1                        |
| Sand Bay                    | 0.08    | 0.02                    | 1.9      | 1.3                      | 2.3       | 1.7                       | 13.9       | 7.1                        |

Table S4. List of crustacean zooplankton taxa observed across sites.

| <b>Taxa</b>            |
|------------------------|
| <b>Cladocera</b>       |
| <i>Bosmina</i>         |
| <i>Bythotrephes</i>    |
| <i>Chydorus</i>        |
| <i>Daphnia</i>         |
| <i>Diaphanosoma</i>    |
| <i>Leptodora</i>       |
| <i>Polyphemus</i>      |
| <b>Copepoda</b>        |
| <i>Diacyclops</i>      |
| <i>Epischura</i>       |
| <i>Eurytemora</i>      |
| Harpacticoida          |
| <i>Leptodiaptomus</i>  |
| <i>Mesocyclops</i>     |
| Nauplii                |
| <i>Skistodiaptomus</i> |
